# Supplementary material for: The Transcriptome of SH-SY5Y at Single-Cell Resolution: A CITE-Seq Data Analysis Workflow
Source: MDPI journal article supplement (doi:10.3390/mps4020028), 2021-05-06
Supplement: s1 [file s1]

## Supplementary Figures

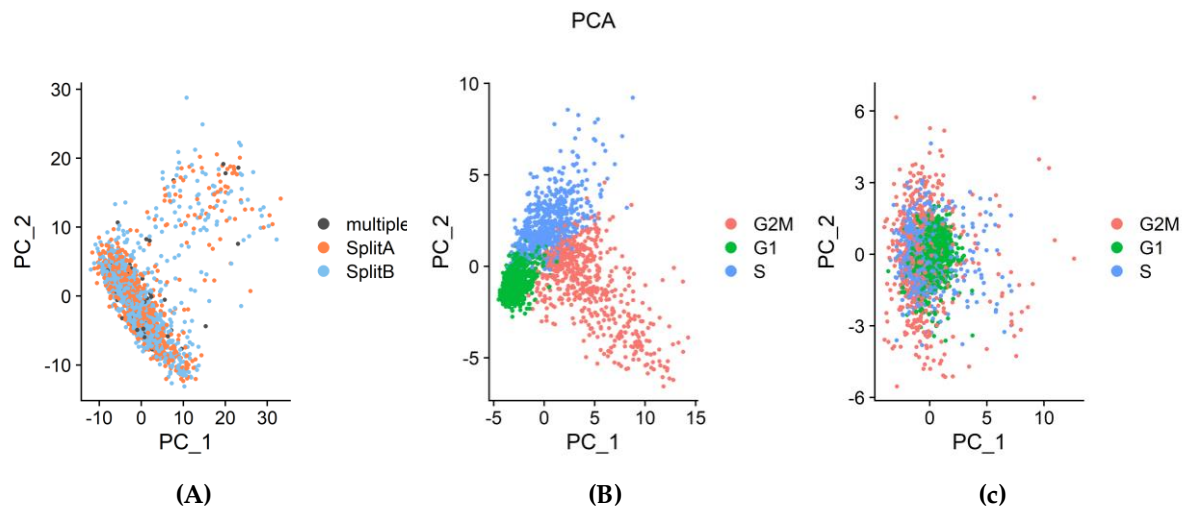

**Figure S1.** Principal Component Analysis. (A) Single cells are plotted along the first two components retaining the highest variance. No difference among the two splits, or multiplets, was detectable. (B) Principal component analysis on cell cycle genes showed a clear separation of cells according to cell cycle genes expression. (C) Complete cell cycle score regression removed the cell cycle variance.

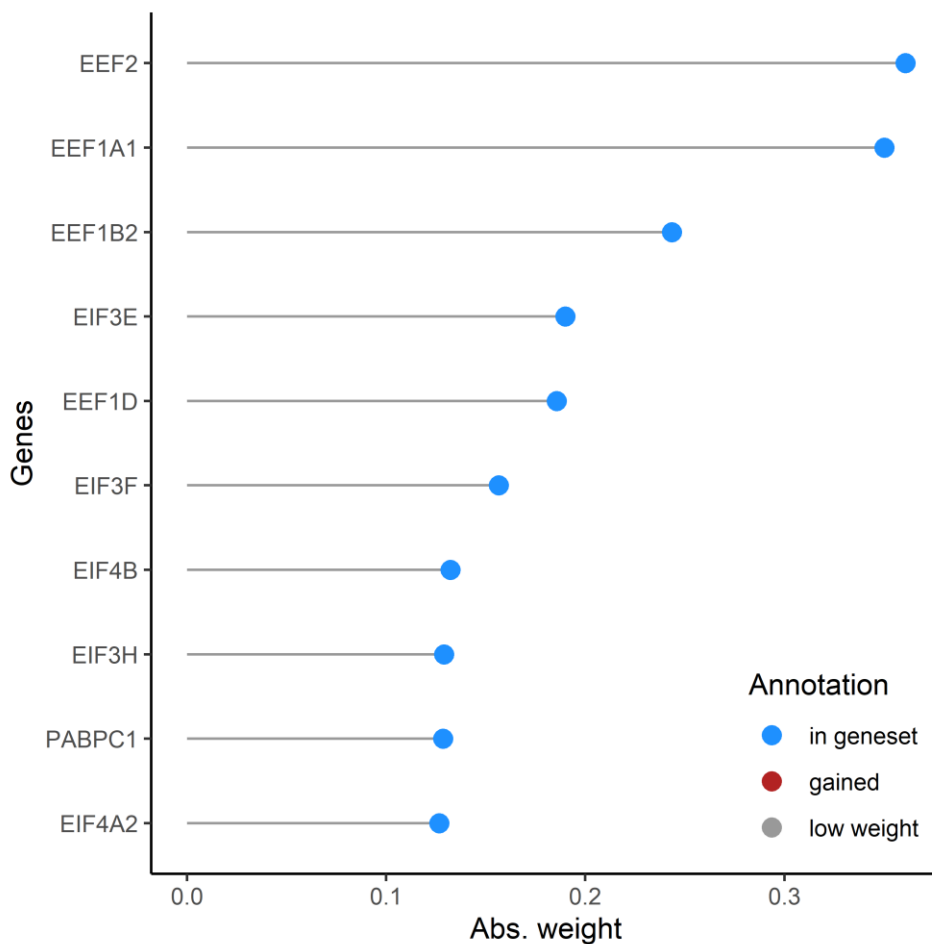

**Figure S2.** Slalom output. Most relevant genes in the WP TRANSLATION FACTORS component.

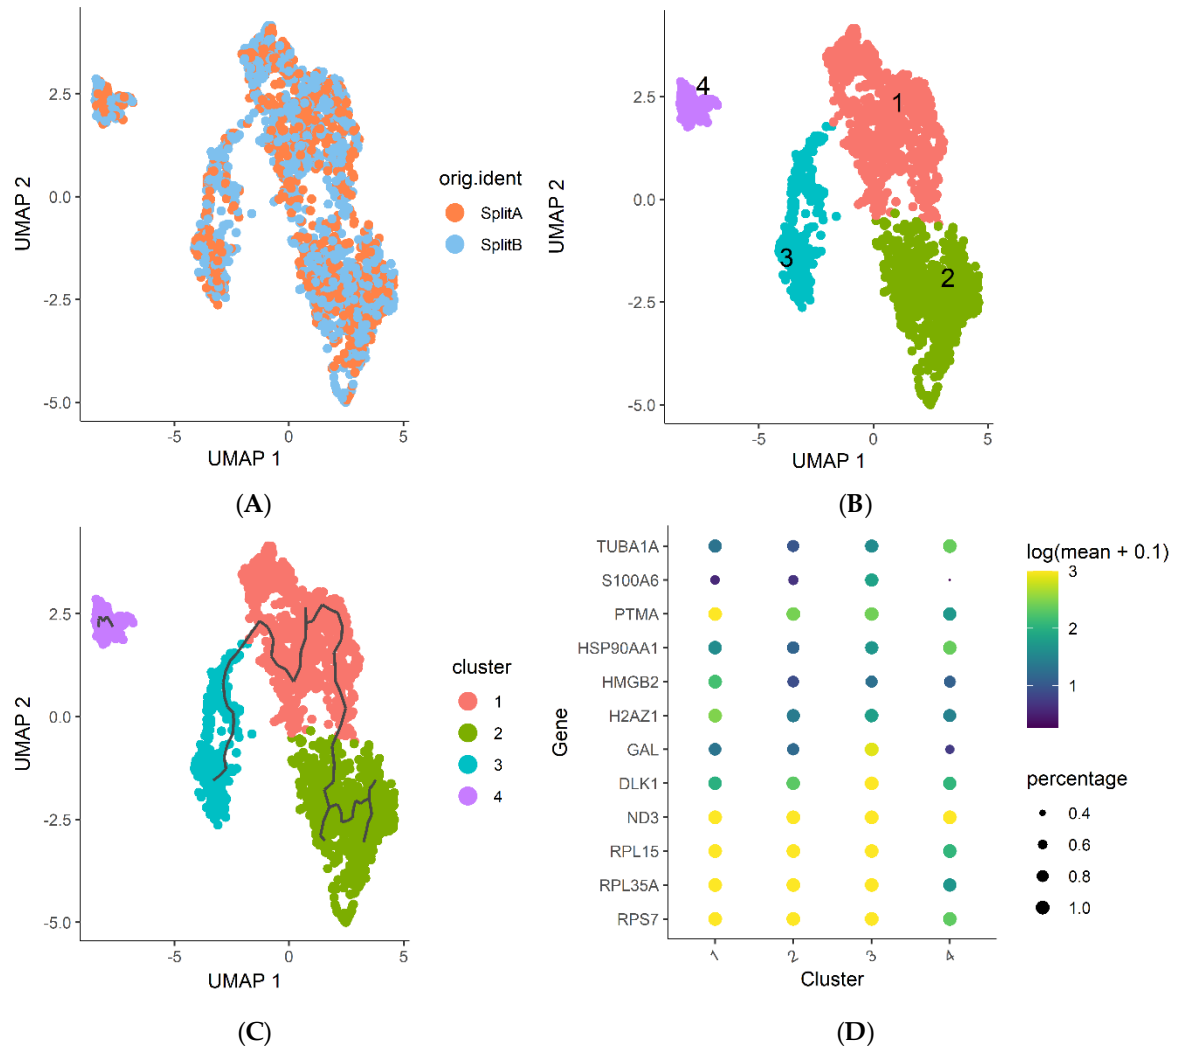

**Figure S3.** Cluster Analysis. (A) UMAP 2D projection of single cells. No detectable difference was observed between splits. (B) Cells can be assigned to 4 cluster-forming communities applying the Leiden algorithm. (C) Unsupervised trajectory learning. Most variant genes show expression differences following a path from cluster 3 to 2. Cluster 4 remains separated from the others. (D) Top 12 genes characterizing each community. Cluster 4 show highest expression of TUBA1A and HSP90AA1, while S100A6 was poorly expressed in a minimal fraction of cells ( $< 0.1$ ). Higher PTMA, HMGB2 and H2AZ1 expression characterizes cluster 1.

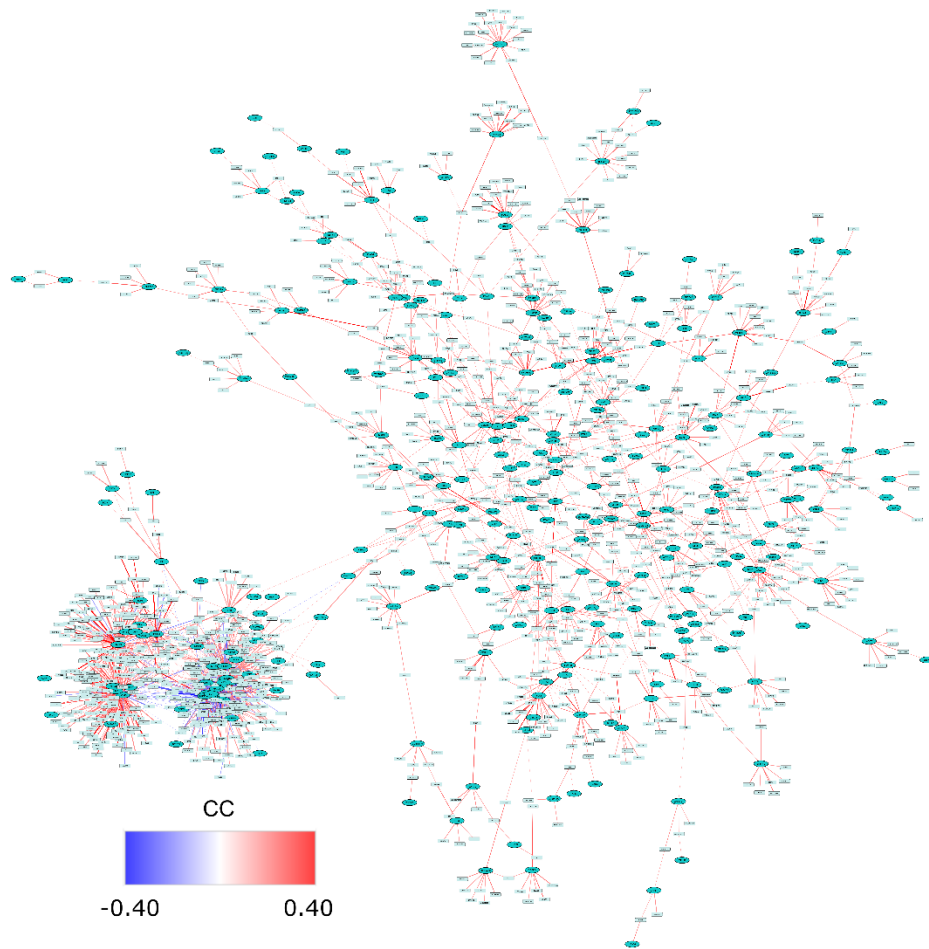

**Figure S4.** SY5Y co-expression network. TFs nodes are showed as cyan colored ellipses, while targets as light grey rectangles. Thickness of edges is proportional to TF-target measured likelihood, while color scale is proportional to the correlation coefficients between the target and the TF.

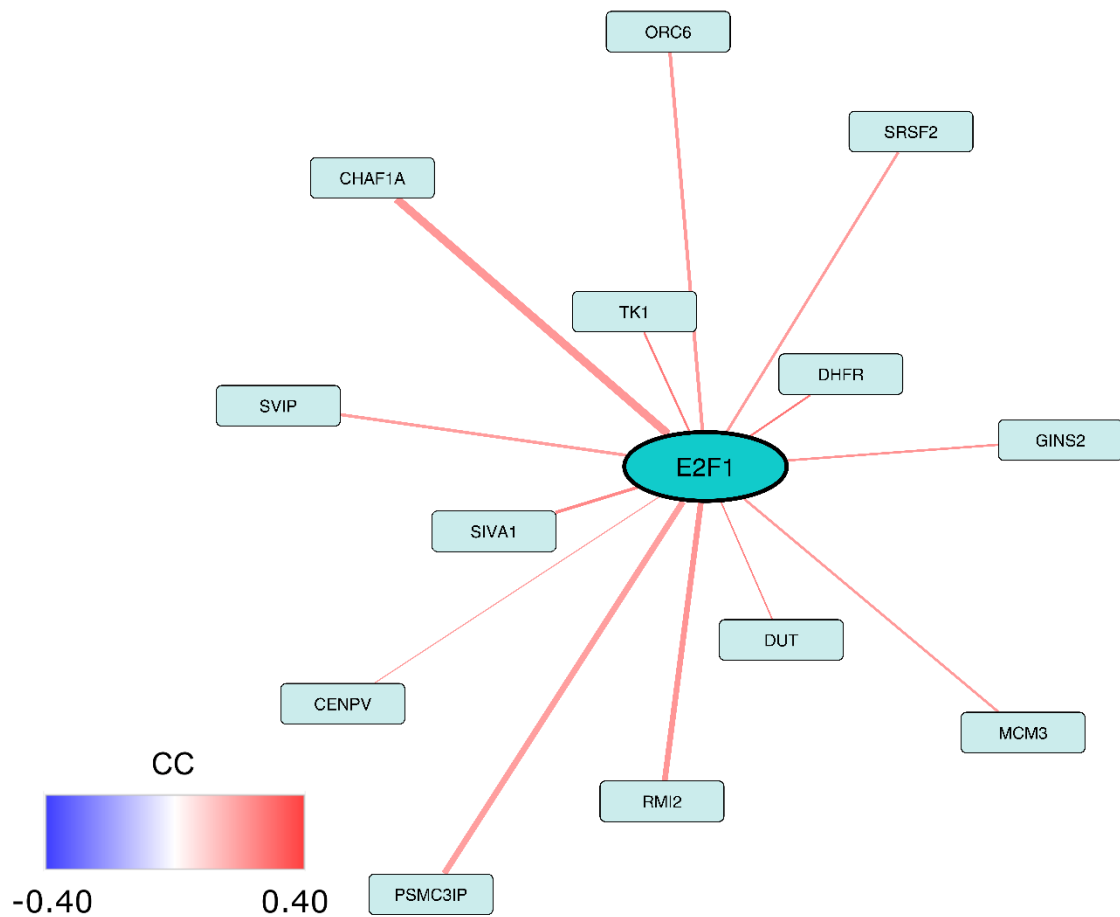

**Figure S5.** E2F1 sub-network. The E2F1 TF is showed as a cyan colored ellipse, while targets as light grey rectangles. Thickness of edges is proportional to TF-target estimated likelihood, while color scale is proportional to the correlation coefficients between the target and the TF.
